# Supplementary material
Source: publisher figshare collection journal article supplement (https://acs.figshare.com/ndownloader/files/4562788)
Supplement: Supplementary file 1 [file 4562788]

 
data_zz35fmi 
 
_audit_creation_method            SHELXL-97 
_chemical_name_systematic 
; 
 ? 
; 
_chemical_name_common             (4-TMS-Ar*ZnH)2 
_chemical_melting_point           ? 
_chemical_formula_moiety          ? 
_chemical_formula_sum 
 'C96 H157.98 I0.02 Si2 Zn2' 
_chemical_formula_weight          1501.66 
 
loop_ 
 _atom_type_symbol 
 _atom_type_description 
 _atom_type_scat_dispersion_real 
 _atom_type_scat_dispersion_imag 
 _atom_type_scat_source 
 'C'  'C'   0.0033   0.0016 
 'International Tables Vol C Tables 4.2.6.8 and 6.1.1.4' 
 'H'  'H'   0.0000   0.0000 
 'International Tables Vol C Tables 4.2.6.8 and 6.1.1.4' 
 'Si'  'Si'   0.0817   0.0704 
 'International Tables Vol C Tables 4.2.6.8 and 6.1.1.4' 
 'Zn'  'Zn'   0.2839   1.4301 
 'International Tables Vol C Tables 4.2.6.8 and 6.1.1.4' 
 'I'  'I'  -0.4742   1.8119 
 'International Tables Vol C Tables 4.2.6.8 and 6.1.1.4' 
 
_symmetry_cell_setting     'Monoclinic'
_symmetry_space_group_name_H-M    'C 2/c'
_symmetry_space_group_name_Hall   '-C 2yc'
 
loop_ 
 _symmetry_equiv_pos_as_xyz 
 'x, y, z' 
 '-x, y, -z+1/2' 
 'x+1/2, y+1/2, z' 
 '-x+1/2, y+1/2, -z+1/2' 
 '-x, -y, -z' 
 'x, -y, z-1/2' 
 '-x+1/2, -y+1/2, -z' 
 'x+1/2, -y+1/2, z-1/2' 
 
_cell_length_a                    20.7441(10) 
_cell_length_b                    17.1921(8) 
_cell_length_c                    28.8855(17) 
_cell_angle_alpha                 90.00 
_cell_angle_beta                  110.3960(10) 
_cell_angle_gamma                 90.00 
_cell_volume                      9655.7(9) 
_cell_formula_units_Z             4 
_cell_measurement_temperature     90(2) 
_cell_measurement_reflns_used     9976 
_cell_measurement_theta_min       2.81 
_cell_measurement_theta_max       26.59 
 
_exptl_crystal_description        block		 
_exptl_crystal_colour             colorless 
_exptl_crystal_size_max           0.51 
_exptl_crystal_size_mid           0.45 
_exptl_crystal_size_min           0.40 
_exptl_crystal_density_meas       0 
_exptl_crystal_density_diffrn     1.033 
_exptl_crystal_density_method     'not measured' 
_exptl_crystal_F_000              3292 
_exptl_absorpt_coefficient_mu     0.567 
_exptl_absorpt_correction_type    'Empirical, SADABS (multi-scan)' 
_exptl_absorpt_correction_T_min   0.7614 
_exptl_absorpt_correction_T_max   0.8065 
_exptl_absorpt_process_details    'SADABS 2.10 (Sheldrick, 2003)' 
 
_exptl_special_details 
; 
 ? 
; 
 
_diffrn_ambient_temperature       180(2) 
_diffrn_radiation_wavelength      0.71073 
_diffrn_radiation_type            MoK\a 
_diffrn_radiation_source          'fine-focus sealed tube' 
_diffrn_radiation_monochromator   graphite 
_diffrn_measurement_device_type   'Bruker APEX-II CCD' 
_diffrn_measurement_method        '\f and \w scans' 
_diffrn_detector_area_resol_mean  ? 
_diffrn_reflns_number             41108 
_diffrn_reflns_av_R_equivalents   0.0502 
_diffrn_reflns_av_sigmaI/netI     0.0405 
_diffrn_reflns_limit_h_min        -26 
_diffrn_reflns_limit_h_max        26 
_diffrn_reflns_limit_k_min        -22 
_diffrn_reflns_limit_k_max        22 
_diffrn_reflns_limit_l_min        -37 
_diffrn_reflns_limit_l_max        37 
_diffrn_reflns_theta_min          2.81 
_diffrn_reflns_theta_max          27.50 
_reflns_number_total              11088 
_reflns_number_gt                 7918 
_reflns_threshold_expression      >2sigma(I) 
 
_computing_data_collection        'Apex2 (2.1.2.21) (Bruker, 2005)' 
_computing_cell_refinement        'SAINT (7.16b) (Bruker, 2004)' 
_computing_data_reduction         'SAINT (7.16b) (Bruker, 2004)' 
_computing_structure_solution     'SHELXS-97 (Sheldrick, 2008)' 
_computing_structure_refinement   'SHELXL-97 (Sheldrick, 2008)' 
_computing_molecular_graphics     'SHELXTL 5.1, XP (Sheldrick, 1994)' 
_computing_publication_material   SHELXL97 
 
_refine_special_details 
; 
 Refinement of F^2^ against ALL reflections.  The weighted R-factor wR and 
 goodness of fit S are based on F^2^, conventional R-factors R are based 
 on F, with F set to zero for negative F^2^. The threshold expression of 
 F^2^ > 2sigma(F^2^) is used only for calculating R-factors(gt) etc. and is 
 not relevant to the choice of reflections for refinement.  R-factors based 
 on F^2^ are statistically about twice as large as those based on F, and R- 
 factors based on ALL data will be even larger. 
; 
 
_refine_ls_structure_factor_coef  Fsqd  
_refine_ls_matrix_type            full 
_refine_ls_weighting_scheme       calc  
_refine_ls_weighting_details 
 'calc w=1/[\s^2^(Fo^2^)+(0.0894P)^2^+4.7868P] where P=(Fo^2^+2Fc^2^)/3' 
_atom_sites_solution_primary      direct 
_atom_sites_solution_secondary    difmap 
_atom_sites_solution_hydrogens    geom 
_refine_ls_hydrogen_treatment     mixed 
_refine_ls_extinction_method      none 
_refine_ls_extinction_coef        ? 
_refine_ls_number_reflns          11088 
_refine_ls_number_parameters      456 
_refine_ls_number_restraints      193 
_refine_ls_R_factor_all           0.0800 
_refine_ls_R_factor_gt            0.0536 
_refine_ls_wR_factor_ref          0.1663 
_refine_ls_wR_factor_gt           0.1540 
_refine_ls_goodness_of_fit_ref    1.090 
_refine_ls_restrained_S_all       1.119 
_refine_ls_shift/su_max           0.000 
_refine_ls_shift/su_mean          0.000 
 
loop_ 
 _atom_site_label 
 _atom_site_type_symbol 
 _atom_site_fract_x 
 _atom_site_fract_y 
 _atom_site_fract_z 
 _atom_site_U_iso_or_equiv 
 _atom_site_adp_type 
 _atom_site_occupancy 
 _atom_site_symmetry_multiplicity 
 _atom_site_calc_flag 
 _atom_site_refinement_flags 
 _atom_site_disorder_assembly 
 _atom_site_disorder_group 
Zn1 Zn 0.446787(13) 0.077525(18) 0.215294(10) 0.04723(12) Uani 1 1 d DU . . 
Si1 Si 0.14341(3) 0.10757(4) 0.03581(2) 0.04328(17) Uani 1 1 d . . . 
H1 H 0.5000 0.1433(19) 0.2500 0.080(9) Uiso 1 2 d SDU . . 
H2 H 0.5000 0.0142(19) 0.2500 0.069(9) Uiso 0.98 2 d SPDU A 1 
I1 I 0.5000 -0.0603(10) 0.2500 0.077(4) Uiso 0.02 2 d SP . 2 
C1 C 0.35988(11) 0.08279(12) 0.16187(8) 0.0354(5) Uani 1 1 d . . . 
C2 C 0.35078(11) 0.13401(12) 0.12220(8) 0.0358(5) Uani 1 1 d . . . 
C3 C 0.28673(11) 0.14037(13) 0.08489(8) 0.0376(5) Uani 1 1 d . . . 
H3 H 0.2815 0.1751 0.0583 0.045 Uiso 1 1 calc R . . 
C4 C 0.22975(11) 0.09705(13) 0.08544(8) 0.0359(5) Uani 1 1 d . . . 
C5 C 0.24012(11) 0.04542(13) 0.12472(8) 0.0361(5) Uani 1 1 d . . . 
H5 H 0.2026 0.0146 0.1257 0.043 Uiso 1 1 calc R . . 
C6 C 0.30366(11) 0.03764(12) 0.16248(8) 0.0342(4) Uani 1 1 d . . . 
C7 C 0.41112(11) 0.18102(13) 0.12087(8) 0.0366(5) Uani 1 1 d . . . 
C8 C 0.42204(12) 0.25667(14) 0.14083(9) 0.0421(5) Uani 1 1 d . . . 
C9 C 0.48074(13) 0.29699(15) 0.14160(9) 0.0471(6) Uani 1 1 d . . . 
H9 H 0.4881 0.3480 0.1551 0.056 Uiso 1 1 calc R . . 
C10 C 0.52860(12) 0.26553(14) 0.12354(9) 0.0438(5) Uani 1 1 d . . . 
C11 C 0.51626(12) 0.19226(14) 0.10366(9) 0.0449(5) Uani 1 1 d . . . 
H11 H 0.5485 0.1700 0.0908 0.054 Uiso 1 1 calc R . . 
C12 C 0.45853(12) 0.14917(13) 0.10149(9) 0.0430(5) Uani 1 1 d . . . 
C13 C 0.37050(14) 0.29546(16) 0.15958(10) 0.0535(6) Uani 1 1 d . . . 
H13 H 0.3381 0.2544 0.1626 0.064 Uiso 1 1 calc R . . 
C14 C 0.4012(2) 0.3334(3) 0.20883(14) 0.0911(12) Uani 1 1 d . . . 
H14A H 0.4258 0.2944 0.2334 0.137 Uiso 1 1 calc R . . 
H14B H 0.3646 0.3566 0.2185 0.137 Uiso 1 1 calc R . . 
H14C H 0.4333 0.3740 0.2070 0.137 Uiso 1 1 calc R . . 
C15 C 0.3281(2) 0.3557(2) 0.12213(17) 0.0972(13) Uani 1 1 d . . . 
H15A H 0.3588 0.3957 0.1173 0.146 Uiso 1 1 calc R . . 
H15B H 0.2947 0.3800 0.1346 0.146 Uiso 1 1 calc R . . 
H15C H 0.3038 0.3300 0.0906 0.146 Uiso 1 1 calc R . . 
C16 C 0.59164(13) 0.31133(16) 0.12336(10) 0.0506(6) Uani 1 1 d . . . 
H16 H 0.6233 0.2734 0.1160 0.061 Uiso 1 1 calc R . . 
C17 C 0.63126(15) 0.3484(2) 0.17226(12) 0.0694(9) Uani 1 1 d . . . 
H17A H 0.6728 0.3731 0.1703 0.104 Uiso 1 1 calc R . . 
H17B H 0.6442 0.3086 0.1981 0.104 Uiso 1 1 calc R . . 
H17C H 0.6025 0.3878 0.1802 0.104 Uiso 1 1 calc R . . 
C18 C 0.57127(18) 0.3697(2) 0.08210(13) 0.0816(11) Uani 1 1 d . . . 
H18A H 0.5508 0.3426 0.0505 0.122 Uiso 1 1 calc R . . 
H18B H 0.6120 0.3984 0.0821 0.122 Uiso 1 1 calc R . . 
H18C H 0.5377 0.4060 0.0868 0.122 Uiso 1 1 calc R . . 
C19 C 0.44696(15) 0.06997(15) 0.07658(12) 0.0586(7) Uani 1 1 d . . . 
H19 H 0.4053 0.0463 0.0808 0.070 Uiso 1 1 calc R . . 
C20 C 0.5064(2) 0.0151(2) 0.09867(18) 0.0982(13) Uani 1 1 d . . . 
H20A H 0.5476 0.0362 0.0939 0.147 Uiso 1 1 calc R . . 
H20B H 0.4953 -0.0357 0.0824 0.147 Uiso 1 1 calc R . . 
H20C H 0.5151 0.0091 0.1341 0.147 Uiso 1 1 calc R . . 
C21 C 0.4329(3) 0.0788(2) 0.02157(16) 0.1054(15) Uani 1 1 d . . . 
H21A H 0.3925 0.1121 0.0069 0.158 Uiso 1 1 calc R . . 
H21B H 0.4242 0.0276 0.0058 0.158 Uiso 1 1 calc R . . 
H21C H 0.4728 0.1026 0.0165 0.158 Uiso 1 1 calc R . . 
C22 C 0.31378(11) -0.01928(13) 0.20393(8) 0.0376(5) Uani 1 1 d . . . 
C23 C 0.34090(14) -0.09327(14) 0.20127(10) 0.0499(6) Uani 1 1 d . . . 
C24 C 0.35218(16) -0.14384(17) 0.24098(13) 0.0667(8) Uani 1 1 d . . . 
H24 H 0.3705 -0.1939 0.2391 0.080 Uiso 1 1 calc R . . 
C25 C 0.33829(17) -0.12511(19) 0.28266(12) 0.0702(9) Uani 1 1 d D . . 
C26 C 0.31176(16) -0.05254(19) 0.28422(11) 0.0631(8) Uani 1 1 d . . . 
H26 H 0.3017 -0.0382 0.3127 0.076 Uiso 1 1 calc R . . 
C27 C 0.29883(13) 0.00134(15) 0.24570(9) 0.0474(6) Uani 1 1 d . . . 
C28 C 0.35549(17) -0.11994(18) 0.15628(13) 0.0662(8) Uani 1 1 d . . . 
H28 H 0.3510 -0.0736 0.1344 0.079 Uiso 1 1 calc R . . 
C29 C 0.4285(2) -0.1514(3) 0.16892(19) 0.1074(15) Uani 1 1 d . . . 
H29A H 0.4615 -0.1130 0.1888 0.161 Uiso 1 1 calc R . . 
H29B H 0.4376 -0.1616 0.1384 0.161 Uiso 1 1 calc R . . 
H29C H 0.4333 -0.1998 0.1877 0.161 Uiso 1 1 calc R . . 
C30 C 0.3032(3) -0.1789(3) 0.12778(18) 0.1264(19) Uani 1 1 d . . . 
H30A H 0.3062 -0.2251 0.1483 0.190 Uiso 1 1 calc R . . 
H30B H 0.3123 -0.1936 0.0978 0.190 Uiso 1 1 calc R . . 
H30C H 0.2570 -0.1564 0.1186 0.190 Uiso 1 1 calc R . . 
C31 C 0.3588(3) -0.1941(3) 0.31950(18) 0.0527(9) Uiso 0.51 1 d PD . 1 
H31 H 0.3950 -0.2242 0.3117 0.063 Uiso 0.51 1 calc PR . 1 
C32 C 0.3921(3) -0.1617(4) 0.3711(2) 0.0707(13) Uiso 0.51 1 d PD . 1 
H32A H 0.4044 -0.2045 0.3950 0.106 Uiso 0.51 1 calc PR . 1 
H32B H 0.3598 -0.1267 0.3787 0.106 Uiso 0.51 1 calc PR . 1 
H32C H 0.4336 -0.1327 0.3730 0.106 Uiso 0.51 1 calc PR . 1 
C33 C 0.3006(3) -0.2466(3) 0.3118(2) 0.0581(10) Uiso 0.51 1 d PD . 1 
H33A H 0.3037 -0.2703 0.3434 0.087 Uiso 0.51 1 calc PR . 1 
H33B H 0.3015 -0.2874 0.2884 0.087 Uiso 0.51 1 calc PR . 1 
H33C H 0.2575 -0.2172 0.2986 0.087 Uiso 0.51 1 calc PR . 1 
C31A C 0.3408(3) -0.1701(3) 0.3295(2) 0.0527(9) Uiso 0.49 1 d PD . 2 
H31A H 0.3295 -0.1301 0.3506 0.063 Uiso 0.49 1 calc PR . 2 
C32A C 0.4136(3) -0.1883(4) 0.3562(3) 0.0707(13) Uiso 0.49 1 d PD . 2 
H32D H 0.4178 -0.2187 0.3858 0.106 Uiso 0.49 1 calc PR . 2 
H32E H 0.4398 -0.1399 0.3658 0.106 Uiso 0.49 1 calc PR . 2 
H32F H 0.4318 -0.2186 0.3347 0.106 Uiso 0.49 1 calc PR . 2 
C33A C 0.2893(3) -0.2270(4) 0.3220(2) 0.0581(10) Uiso 0.49 1 d PD . 2 
H33D H 0.2729 -0.2435 0.2873 0.087 Uiso 0.49 1 calc PR . 2 
H33E H 0.2509 -0.2051 0.3301 0.087 Uiso 0.49 1 calc PR . 2 
H33F H 0.3081 -0.2719 0.3433 0.087 Uiso 0.49 1 calc PR . 2 
C34 C 0.26895(17) 0.07974(17) 0.25044(11) 0.0614(7) Uani 1 1 d . . . 
H34 H 0.2661 0.1108 0.2205 0.074 Uiso 1 1 calc R . . 
C35 C 0.3127(3) 0.1252(3) 0.29530(15) 0.1020(14) Uani 1 1 d . . . 
H35A H 0.3175 0.0955 0.3253 0.153 Uiso 1 1 calc R . . 
H35B H 0.2906 0.1752 0.2964 0.153 Uiso 1 1 calc R . . 
H35C H 0.3583 0.1342 0.2932 0.153 Uiso 1 1 calc R . . 
C36 C 0.1956(2) 0.0699(3) 0.2506(2) 0.1114(16) Uani 1 1 d . . . 
H36A H 0.1967 0.0391 0.2794 0.167 Uiso 1 1 calc R . . 
H36B H 0.1675 0.0432 0.2203 0.167 Uiso 1 1 calc R . . 
H36C H 0.1758 0.1212 0.2521 0.167 Uiso 1 1 calc R . . 
C37 C 0.13008(18) 0.0273(2) -0.00964(11) 0.0752(9) Uani 1 1 d . . . 
H37A H 0.1652 0.0303 -0.0252 0.113 Uiso 1 1 calc R . . 
H37B H 0.0843 0.0321 -0.0350 0.113 Uiso 1 1 calc R . . 
H37C H 0.1337 -0.0228 0.0073 0.113 Uiso 1 1 calc R . . 
C38 C 0.07613(15) 0.1009(2) 0.06443(12) 0.0676(8) Uani 1 1 d . . . 
H38A H 0.0308 0.1099 0.0392 0.101 Uiso 1 1 calc R . . 
H38B H 0.0848 0.1403 0.0904 0.101 Uiso 1 1 calc R . . 
H38C H 0.0772 0.0491 0.0788 0.101 Uiso 1 1 calc R . . 
C39 C 0.13816(17) 0.20386(19) 0.00530(12) 0.0749(10) Uani 1 1 d . . . 
H39A H 0.1720 0.2061 -0.0114 0.112 Uiso 1 1 calc R . . 
H39B H 0.1479 0.2451 0.0302 0.112 Uiso 1 1 calc R . . 
H39C H 0.0919 0.2111 -0.0190 0.112 Uiso 1 1 calc R . . 
C41 C -0.0897(5) 0.2086(5) 0.0479(3) 0.150(3) Uiso 0.65 1 d PD B 1 
H41A H -0.0891 0.2197 0.0814 0.225 Uiso 0.65 1 calc PR B 1 
H41B H -0.0485 0.1789 0.0499 0.225 Uiso 0.65 1 calc PR B 1 
H41C H -0.1308 0.1782 0.0300 0.225 Uiso 0.65 1 calc PR B 1 
C42 C -0.0906(5) 0.2820(6) 0.0218(4) 0.144(3) Uiso 0.65 1 d PD B 1 
H42A H -0.0584 0.2798 0.0033 0.172 Uiso 0.65 1 calc PR B 1 
H42B H -0.0776 0.3260 0.0453 0.172 Uiso 0.65 1 calc PR B 1 
C43 C -0.1625(5) 0.2905(5) -0.0126(4) 0.171(4) Uiso 0.65 1 d PD B 1 
H43A H -0.1944 0.2628 0.0004 0.205 Uiso 0.65 1 calc PR B 1 
H43B H -0.1675 0.2687 -0.0454 0.205 Uiso 0.65 1 calc PR B 1 
C44 C -0.1777(9) 0.3751(7) -0.0166(4) 0.295(10) Uiso 0.65 1 d PD B 1 
H44A H -0.2023 0.3901 0.0059 0.354 Uiso 0.65 1 calc PR B 1 
H44B H -0.1346 0.4056 -0.0078 0.354 Uiso 0.65 1 calc PR B 1 
C45 C -0.2209(10) 0.3894(7) -0.0680(5) 0.275(9) Uiso 0.65 1 d PD B 1 
H45A H -0.2031 0.3596 -0.0903 0.330 Uiso 0.65 1 calc PR B 1 
H45B H -0.2685 0.3720 -0.0736 0.330 Uiso 0.65 1 calc PR B 1 
C46 C -0.2204(6) 0.4718(6) -0.0785(4) 0.165(4) Uiso 0.65 1 d PD B 1 
H46A H -0.2125 0.5015 -0.0480 0.247 Uiso 0.65 1 calc PR B 1 
H46B H -0.2649 0.4867 -0.1030 0.247 Uiso 0.65 1 calc PR B 1 
H46C H -0.1837 0.4830 -0.0915 0.247 Uiso 0.65 1 calc PR B 1 
C41A C 0.4523(14) -0.2516(15) 0.0318(12) 0.259(15) Uiso 0.35 1 d PD C 2 
H41D H 0.4742 -0.2227 0.0120 0.388 Uiso 0.35 1 calc PR C 2 
H41E H 0.4603 -0.3074 0.0296 0.388 Uiso 0.35 1 calc PR C 2 
H41F H 0.4718 -0.2350 0.0663 0.388 Uiso 0.35 1 calc PR C 2 
C42A C 0.3778(13) -0.2362(12) 0.0129(11) 0.277(19) Uiso 0.35 1 d PD C 2 
H42C H 0.3566 -0.2532 0.0371 0.332 Uiso 0.35 1 calc PR C 2 
H42D H 0.3553 -0.2639 -0.0186 0.332 Uiso 0.35 1 calc PR C 2 
C43A C 0.3711(9) -0.1509(10) 0.0055(6) 0.171(4) Uiso 0.35 1 d PD C 2 
H43C H 0.3499 -0.1274 0.0281 0.205 Uiso 0.35 1 calc PR C 2 
H43D H 0.4169 -0.1269 0.0121 0.205 Uiso 0.35 1 calc PR C 2 
C44A C 0.3274(7) -0.1382(9) -0.0459(5) 0.127(5) Uiso 0.35 1 d PD C 2 
H44C H 0.3046 -0.1873 -0.0608 0.152 Uiso 0.35 1 calc PR C 2 
H44D H 0.3553 -0.1194 -0.0653 0.152 Uiso 0.35 1 calc PR C 2 
C45A C 0.2758(11) -0.0796(14) -0.0459(7) 0.206(12) Uiso 0.35 1 d PD C 2 
H45C H 0.2984 -0.0296 -0.0326 0.247 Uiso 0.35 1 calc PR C 2 
H45D H 0.2493 -0.0972 -0.0252 0.247 Uiso 0.35 1 calc PR C 2 
C46A C 0.2298(9) -0.0701(12) -0.0978(7) 0.168(8) Uiso 0.35 1 d PD C 2 
H46D H 0.2428 -0.1073 -0.1187 0.252 Uiso 0.35 1 calc PR C 2 
H46E H 0.2339 -0.0170 -0.1089 0.252 Uiso 0.35 1 calc PR C 2 
H46F H 0.1821 -0.0797 -0.1003 0.252 Uiso 0.35 1 calc PR C 2 
C51 C 0.0218(6) -0.0483(7) -0.1515(3) 0.122(3) Uiso 0.50 1 d PD . . 
H51A H 0.0102 0.0028 -0.1672 0.183 Uiso 0.50 1 calc PR . . 
H51B H 0.0626 -0.0437 -0.1216 0.183 Uiso 0.50 1 calc PR . . 
H51C H -0.0169 -0.0678 -0.1429 0.183 Uiso 0.50 1 calc PR . . 
C52 C 0.0361(12) -0.1025(11) -0.1858(3) 0.227(10) Uiso 0.50 1 d PD . . 
H52A H 0.0864 -0.1087 -0.1773 0.273 Uiso 0.50 1 calc PR . . 
H52B H 0.0160 -0.1541 -0.1840 0.273 Uiso 0.50 1 calc PR . . 
C53 C 0.0055(9) -0.0701(6) -0.2355(3) 0.138(4) Uiso 0.50 1 d PD . . 
H53A H -0.0371 -0.0416 -0.2381 0.166 Uiso 0.50 1 calc PR . . 
H53B H 0.0379 -0.0329 -0.2418 0.166 Uiso 0.50 1 calc PR . . 
C54 C -0.0103(9) -0.1316(7) -0.2718(3) 0.181(6) Uiso 0.50 1 d PD . . 
H54A H -0.0577 -0.1503 -0.2782 0.217 Uiso 0.50 1 calc PR . . 
H54B H 0.0215 -0.1757 -0.2587 0.217 Uiso 0.50 1 calc PR . . 
C55 C -0.0040(9) -0.1046(10) -0.3177(4) 0.172(7) Uiso 0.50 1 d PD . . 
H55A H 0.0261 -0.0582 -0.3112 0.206 Uiso 0.50 1 calc PR . . 
H55B H 0.0173 -0.1458 -0.3316 0.206 Uiso 0.50 1 calc PR . . 
C56 C -0.0714(12) -0.0852(15) -0.3529(6) 0.308(15) Uiso 0.50 1 d PD . . 
H56A H -0.0880 -0.1282 -0.3764 0.462 Uiso 0.50 1 calc PR . . 
H56B H -0.0680 -0.0379 -0.3709 0.462 Uiso 0.50 1 calc PR . . 
H56C H -0.1035 -0.0765 -0.3354 0.462 Uiso 0.50 1 calc PR . . 
 
loop_ 
 _atom_site_aniso_label 
 _atom_site_aniso_U_11 
 _atom_site_aniso_U_22 
 _atom_site_aniso_U_33 
 _atom_site_aniso_U_23 
 _atom_site_aniso_U_13 
 _atom_site_aniso_U_12 
Zn1 0.02955(16) 0.0567(2) 0.04365(18) 0.00893(12) -0.00210(12) -0.00509(11) 
Si1 0.0330(3) 0.0466(4) 0.0390(3) 0.0055(3) -0.0015(3) -0.0044(3) 
C1 0.0299(10) 0.0370(11) 0.0356(11) 0.0050(9) 0.0066(9) -0.0052(8) 
C2 0.0305(10) 0.0370(11) 0.0360(11) 0.0049(9) 0.0064(9) -0.0061(8) 
C3 0.0347(11) 0.0390(11) 0.0345(11) 0.0082(9) 0.0066(9) -0.0042(9) 
C4 0.0299(10) 0.0371(11) 0.0356(11) 0.0023(9) 0.0050(8) -0.0041(8) 
C5 0.0293(10) 0.0371(11) 0.0382(11) 0.0032(9) 0.0070(9) -0.0075(8) 
C6 0.0313(10) 0.0336(10) 0.0345(10) 0.0050(8) 0.0073(8) -0.0032(8) 
C7 0.0311(10) 0.0385(11) 0.0356(11) 0.0064(9) 0.0060(9) -0.0076(9) 
C8 0.0401(12) 0.0427(12) 0.0416(12) 0.0016(10) 0.0119(10) -0.0082(10) 
C9 0.0474(13) 0.0447(13) 0.0487(14) -0.0044(10) 0.0163(11) -0.0149(11) 
C10 0.0372(12) 0.0494(13) 0.0429(12) 0.0049(10) 0.0114(10) -0.0120(10) 
C11 0.0362(12) 0.0468(13) 0.0533(14) 0.0032(11) 0.0174(10) -0.0041(10) 
C12 0.0377(12) 0.0393(12) 0.0502(13) 0.0046(10) 0.0130(10) -0.0054(9) 
C13 0.0512(15) 0.0540(15) 0.0611(16) -0.0078(12) 0.0269(13) -0.0118(12) 
C14 0.077(2) 0.118(3) 0.084(3) -0.038(2) 0.035(2) -0.014(2) 
C15 0.093(3) 0.100(3) 0.111(3) 0.026(2) 0.052(3) 0.037(2) 
C16 0.0419(13) 0.0559(15) 0.0559(15) 0.0020(12) 0.0195(11) -0.0165(11) 
C17 0.0503(16) 0.085(2) 0.0708(19) -0.0121(16) 0.0190(15) -0.0310(15) 
C18 0.069(2) 0.096(3) 0.077(2) 0.0307(19) 0.0206(17) -0.0303(19) 
C19 0.0496(15) 0.0456(15) 0.086(2) -0.0104(14) 0.0303(15) -0.0102(12) 
C20 0.094(3) 0.0519(19) 0.144(4) -0.007(2) 0.036(3) 0.0131(19) 
C21 0.150(5) 0.073(2) 0.084(3) -0.029(2) 0.029(3) -0.019(2) 
C22 0.0299(10) 0.0378(11) 0.0401(11) 0.0089(9) 0.0057(9) -0.0064(9) 
C23 0.0450(14) 0.0425(13) 0.0592(16) 0.0121(11) 0.0142(12) -0.0005(10) 
C24 0.0621(18) 0.0459(15) 0.080(2) 0.0256(14) 0.0102(16) -0.0005(13) 
C25 0.069(2) 0.0650(19) 0.0622(19) 0.0296(15) 0.0053(15) -0.0201(15) 
C26 0.0655(18) 0.077(2) 0.0444(14) 0.0156(13) 0.0158(13) -0.0187(16) 
C27 0.0443(13) 0.0539(14) 0.0409(12) 0.0059(11) 0.0111(10) -0.0103(11) 
C28 0.072(2) 0.0524(16) 0.079(2) 0.0050(15) 0.0330(17) 0.0107(14) 
C29 0.089(3) 0.101(3) 0.143(4) -0.009(3) 0.054(3) 0.023(2) 
C30 0.114(4) 0.162(5) 0.113(4) -0.072(4) 0.052(3) -0.035(3) 
C34 0.0683(19) 0.0659(18) 0.0522(16) 0.0000(13) 0.0239(14) 0.0015(14) 
C35 0.125(4) 0.086(3) 0.082(3) -0.028(2) 0.019(2) -0.006(2) 
C36 0.084(3) 0.118(4) 0.147(4) -0.007(3) 0.060(3) 0.011(2) 
C37 0.075(2) 0.084(2) 0.0517(17) -0.0168(16) 0.0022(15) -0.0081(18) 
C38 0.0375(14) 0.085(2) 0.075(2) 0.0045(17) 0.0123(14) 0.0045(14) 
C39 0.0614(18) 0.0688(19) 0.069(2) 0.0267(16) -0.0094(15) -0.0048(15) 
 
_geom_special_details 
; 
 All esds (except the esd in the dihedral angle between two l.s. planes) 
 are estimated using the full covariance matrix.  The cell esds are taken 
 into account individually in the estimation of esds in distances, angles 
 and torsion angles; correlations between esds in cell parameters are only 
 used when they are defined by crystal symmetry.  An approximate (isotropic) 
 treatment of cell esds is used for estimating esds involving l.s. planes. 
; 
 
loop_ 
 _geom_bond_atom_site_label_1 
 _geom_bond_atom_site_label_2 
 _geom_bond_distance 
 _geom_bond_site_symmetry_2 
 _geom_bond_publ_flag 
Zn1 C1 1.924(2) . ? 
Zn1 Zn1 2.4102(5) 2_655 ? 
Zn1 I1 2.659(16) . ? 
Zn1 H1 1.65(2) . ? 
Zn1 H2 1.62(2) . ? 
Si1 C38 1.857(3) . ? 
Si1 C37 1.858(3) . ? 
Si1 C39 1.861(3) . ? 
Si1 C4 1.872(2) . ? 
I1 Zn1 2.659(16) 2_655 ? 
I1 H2 1.28(3) . ? 
C1 C2 1.405(3) . ? 
C1 C6 1.406(3) . ? 
C2 C3 1.393(3) . ? 
C2 C7 1.502(3) . ? 
C3 C4 1.402(3) . ? 
C3 H3 0.9500 . ? 
C4 C5 1.397(3) . ? 
C5 C6 1.394(3) . ? 
C5 H5 0.9500 . ? 
C6 C22 1.503(3) . ? 
C7 C12 1.401(3) . ? 
C7 C8 1.409(3) . ? 
C8 C9 1.394(3) . ? 
C8 C13 1.512(4) . ? 
C9 C10 1.383(4) . ? 
C9 H9 0.9500 . ? 
C10 C11 1.371(3) . ? 
C10 C16 1.528(3) . ? 
C11 C12 1.391(3) . ? 
C11 H11 0.9500 . ? 
C12 C19 1.520(3) . ? 
C13 C14 1.491(4) . ? 
C13 C15 1.534(5) . ? 
C13 H13 1.0000 . ? 
C14 H14A 0.9800 . ? 
C14 H14B 0.9800 . ? 
C14 H14C 0.9800 . ? 
C15 H15A 0.9800 . ? 
C15 H15B 0.9800 . ? 
C15 H15C 0.9800 . ? 
C16 C18 1.501(4) . ? 
C16 C17 1.506(4) . ? 
C16 H16 1.0000 . ? 
C17 H17A 0.9800 . ? 
C17 H17B 0.9800 . ? 
C17 H17C 0.9800 . ? 
C18 H18A 0.9800 . ? 
C18 H18B 0.9800 . ? 
C18 H18C 0.9800 . ? 
C19 C20 1.506(5) . ? 
C19 C21 1.520(5) . ? 
C19 H19 1.0000 . ? 
C20 H20A 0.9800 . ? 
C20 H20B 0.9800 . ? 
C20 H20C 0.9800 . ? 
C21 H21A 0.9800 . ? 
C21 H21B 0.9800 . ? 
C21 H21C 0.9800 . ? 
C22 C27 1.392(3) . ? 
C22 C23 1.404(3) . ? 
C23 C24 1.392(4) . ? 
C23 C28 1.505(4) . ? 
C24 C25 1.371(5) . ? 
C24 H24 0.9500 . ? 
C25 C26 1.371(5) . ? 
C25 C31A 1.544(5) . ? 
C25 C31 1.550(5) . ? 
C26 C27 1.400(4) . ? 
C26 H26 0.9500 . ? 
C27 C34 1.510(4) . ? 
C28 C30 1.503(5) . ? 
C28 C29 1.528(5) . ? 
C28 H28 1.0000 . ? 
C29 H29A 0.9800 . ? 
C29 H29B 0.9800 . ? 
C29 H29C 0.9800 . ? 
C30 H30A 0.9800 . ? 
C30 H30B 0.9800 . ? 
C30 H30C 0.9800 . ? 
C31 C33 1.461(6) . ? 
C31 C32 1.514(6) . ? 
C31 H31 1.0000 . ? 
C32 H32A 0.9800 . ? 
C32 H32B 0.9800 . ? 
C32 H32C 0.9800 . ? 
C33 H33A 0.9800 . ? 
C33 H33B 0.9800 . ? 
C33 H33C 0.9800 . ? 
C31A C33A 1.409(6) . ? 
C31A C32A 1.470(6) . ? 
C31A H31A 1.0000 . ? 
C32A H32D 0.9800 . ? 
C32A H32E 0.9800 . ? 
C32A H32F 0.9800 . ? 
C33A H33D 0.9800 . ? 
C33A H33E 0.9800 . ? 
C33A H33F 0.9800 . ? 
C34 C35 1.514(5) . ? 
C34 C36 1.532(5) . ? 
C34 H34 1.0000 . ? 
C35 H35A 0.9800 . ? 
C35 H35B 0.9800 . ? 
C35 H35C 0.9800 . ? 
C36 H36A 0.9800 . ? 
C36 H36B 0.9800 . ? 
C36 H36C 0.9800 . ? 
C37 H37A 0.9800 . ? 
C37 H37B 0.9800 . ? 
C37 H37C 0.9800 . ? 
C38 H38A 0.9800 . ? 
C38 H38B 0.9800 . ? 
C38 H38C 0.9800 . ? 
C39 H39A 0.9800 . ? 
C39 H39B 0.9800 . ? 
C39 H39C 0.9800 . ? 
C41 C42 1.467(7) . ? 
C41 H41A 0.9800 . ? 
C41 H41B 0.9800 . ? 
C41 H41C 0.9800 . ? 
C42 C43 1.482(8) . ? 
C42 H42A 0.9900 . ? 
C42 H42B 0.9900 . ? 
C43 C44 1.484(8) . ? 
C43 H43A 0.9900 . ? 
C43 H43B 0.9900 . ? 
C44 C45 1.463(8) . ? 
C44 H44A 0.9900 . ? 
C44 H44B 0.9900 . ? 
C45 C46 1.450(8) . ? 
C45 H45A 0.9900 . ? 
C45 H45B 0.9900 . ? 
C46 H46A 0.9800 . ? 
C46 H46B 0.9800 . ? 
C46 H46C 0.9800 . ? 
C41A C42A 1.471(9) . ? 
C41A H41D 0.9800 . ? 
C41A H41E 0.9800 . ? 
C41A H41F 0.9800 . ? 
C42A C43A 1.482(9) . ? 
C42A H42C 0.9900 . ? 
C42A H42D 0.9900 . ? 
C43A C44A 1.461(8) . ? 
C43A H43C 0.9900 . ? 
C43A H43D 0.9900 . ? 
C44A C45A 1.470(9) . ? 
C44A H44C 0.9900 . ? 
C44A H44D 0.9900 . ? 
C45A C46A 1.481(9) . ? 
C45A H45C 0.9900 . ? 
C45A H45D 0.9900 . ? 
C46A H46D 0.9800 . ? 
C46A H46E 0.9800 . ? 
C46A H46F 0.9800 . ? 
C51 C52 1.463(8) . ? 
C51 H51A 0.9800 . ? 
C51 H51B 0.9800 . ? 
C51 H51C 0.9800 . ? 
C52 C53 1.461(8) . ? 
C52 H52A 0.9900 . ? 
C52 H52B 0.9900 . ? 
C53 C54 1.444(7) . ? 
C53 H53A 0.9900 . ? 
C53 H53B 0.9900 . ? 
C54 C55 1.453(8) . ? 
C54 H54A 0.9900 . ? 
C54 H54B 0.9900 . ? 
C55 C56 1.453(8) . ? 
C55 H55A 0.9900 . ? 
C55 H55B 0.9900 . ? 
C56 H56A 0.9800 . ? 
C56 H56B 0.9800 . ? 
C56 H56C 0.9800 . ? 
 
loop_ 
 _geom_angle_atom_site_label_1 
 _geom_angle_atom_site_label_2 
 _geom_angle_atom_site_label_3 
 _geom_angle 
 _geom_angle_site_symmetry_1 
 _geom_angle_site_symmetry_3 
 _geom_angle_publ_flag 
C1 Zn1 Zn1 176.39(7) . 2_655 ? 
C1 Zn1 I1 119.62(19) . . ? 
Zn1 Zn1 I1 63.05(17) 2_655 . ? 
C1 Zn1 H1 134.1(8) . . ? 
Zn1 Zn1 H1 43.2(8) 2_655 . ? 
I1 Zn1 H1 106.3(8) . . ? 
C1 Zn1 H2 140.6(8) . . ? 
Zn1 Zn1 H2 42.1(8) 2_655 . ? 
I1 Zn1 H2 21.0(8) . . ? 
H1 Zn1 H2 85.3(12) . . ? 
C38 Si1 C37 108.60(16) . . ? 
C38 Si1 C39 109.67(17) . . ? 
C37 Si1 C39 110.88(17) . . ? 
C38 Si1 C4 108.67(12) . . ? 
C37 Si1 C4 109.65(13) . . ? 
C39 Si1 C4 109.33(12) . . ? 
Zn1 I1 Zn1 53.9(3) 2_655 . ? 
Zn1 I1 H2 26.95(17) 2_655 . ? 
Zn1 I1 H2 26.95(17) . . ? 
C2 C1 C6 118.68(19) . . ? 
C2 C1 Zn1 120.39(15) . . ? 
C6 C1 Zn1 120.89(15) . . ? 
C3 C2 C1 120.08(19) . . ? 
C3 C2 C7 121.11(19) . . ? 
C1 C2 C7 118.81(18) . . ? 
C2 C3 C4 122.01(19) . . ? 
C2 C3 H3 119.0 . . ? 
C4 C3 H3 119.0 . . ? 
C5 C4 C3 117.07(19) . . ? 
C5 C4 Si1 121.25(16) . . ? 
C3 C4 Si1 121.69(16) . . ? 
C6 C5 C4 122.18(19) . . ? 
C6 C5 H5 118.9 . . ? 
C4 C5 H5 118.9 . . ? 
C5 C6 C1 119.97(19) . . ? 
C5 C6 C22 121.15(18) . . ? 
C1 C6 C22 118.88(18) . . ? 
C12 C7 C8 119.3(2) . . ? 
C12 C7 C2 120.5(2) . . ? 
C8 C7 C2 120.2(2) . . ? 
C9 C8 C7 118.7(2) . . ? 
C9 C8 C13 119.8(2) . . ? 
C7 C8 C13 121.4(2) . . ? 
C10 C9 C8 122.5(2) . . ? 
C10 C9 H9 118.8 . . ? 
C8 C9 H9 118.8 . . ? 
C11 C10 C9 117.6(2) . . ? 
C11 C10 C16 120.5(2) . . ? 
C9 C10 C16 121.8(2) . . ? 
C10 C11 C12 122.7(2) . . ? 
C10 C11 H11 118.6 . . ? 
C12 C11 H11 118.6 . . ? 
C11 C12 C7 119.1(2) . . ? 
C11 C12 C19 119.3(2) . . ? 
C7 C12 C19 121.5(2) . . ? 
C14 C13 C8 114.5(3) . . ? 
C14 C13 C15 109.1(3) . . ? 
C8 C13 C15 110.4(2) . . ? 
C14 C13 H13 107.5 . . ? 
C8 C13 H13 107.5 . . ? 
C15 C13 H13 107.5 . . ? 
C13 C14 H14A 109.5 . . ? 
C13 C14 H14B 109.5 . . ? 
H14A C14 H14B 109.5 . . ? 
C13 C14 H14C 109.5 . . ? 
H14A C14 H14C 109.5 . . ? 
H14B C14 H14C 109.5 . . ? 
C13 C15 H15A 109.5 . . ? 
C13 C15 H15B 109.5 . . ? 
H15A C15 H15B 109.5 . . ? 
C13 C15 H15C 109.5 . . ? 
H15A C15 H15C 109.5 . . ? 
H15B C15 H15C 109.5 . . ? 
C18 C16 C17 111.8(3) . . ? 
C18 C16 C10 110.0(2) . . ? 
C17 C16 C10 113.8(2) . . ? 
C18 C16 H16 106.9 . . ? 
C17 C16 H16 106.9 . . ? 
C10 C16 H16 106.9 . . ? 
C16 C17 H17A 109.5 . . ? 
C16 C17 H17B 109.5 . . ? 
H17A C17 H17B 109.5 . . ? 
C16 C17 H17C 109.5 . . ? 
H17A C17 H17C 109.5 . . ? 
H17B C17 H17C 109.5 . . ? 
C16 C18 H18A 109.5 . . ? 
C16 C18 H18B 109.5 . . ? 
H18A C18 H18B 109.5 . . ? 
C16 C18 H18C 109.5 . . ? 
H18A C18 H18C 109.5 . . ? 
H18B C18 H18C 109.5 . . ? 
C20 C19 C12 112.9(3) . . ? 
C20 C19 C21 109.7(3) . . ? 
C12 C19 C21 110.3(2) . . ? 
C20 C19 H19 107.9 . . ? 
C12 C19 H19 107.9 . . ? 
C21 C19 H19 107.9 . . ? 
C19 C20 H20A 109.5 . . ? 
C19 C20 H20B 109.5 . . ? 
H20A C20 H20B 109.5 . . ? 
C19 C20 H20C 109.5 . . ? 
H20A C20 H20C 109.5 . . ? 
H20B C20 H20C 109.5 . . ? 
C19 C21 H21A 109.5 . . ? 
C19 C21 H21B 109.5 . . ? 
H21A C21 H21B 109.5 . . ? 
C19 C21 H21C 109.5 . . ? 
H21A C21 H21C 109.5 . . ? 
H21B C21 H21C 109.5 . . ? 
C27 C22 C23 119.5(2) . . ? 
C27 C22 C6 120.9(2) . . ? 
C23 C22 C6 119.6(2) . . ? 
C24 C23 C22 118.4(3) . . ? 
C24 C23 C28 119.6(3) . . ? 
C22 C23 C28 121.9(2) . . ? 
C25 C24 C23 123.4(3) . . ? 
C25 C24 H24 118.3 . . ? 
C23 C24 H24 118.3 . . ? 
C24 C25 C26 116.9(2) . . ? 
C24 C25 C31A 134.3(4) . . ? 
C26 C25 C31A 108.6(4) . . ? 
C24 C25 C31 109.4(4) . . ? 
C26 C25 C31 133.7(4) . . ? 
C31A C25 C31 25.5(2) . . ? 
C25 C26 C27 123.0(3) . . ? 
C25 C26 H26 118.5 . . ? 
C27 C26 H26 118.5 . . ? 
C22 C27 C26 118.8(3) . . ? 
C22 C27 C34 121.9(2) . . ? 
C26 C27 C34 119.3(3) . . ? 
C30 C28 C23 110.8(3) . . ? 
C30 C28 C29 111.0(3) . . ? 
C23 C28 C29 112.5(3) . . ? 
C30 C28 H28 107.5 . . ? 
C23 C28 H28 107.5 . . ? 
C29 C28 H28 107.5 . . ? 
C28 C29 H29A 109.5 . . ? 
C28 C29 H29B 109.5 . . ? 
H29A C29 H29B 109.5 . . ? 
C28 C29 H29C 109.5 . . ? 
H29A C29 H29C 109.5 . . ? 
H29B C29 H29C 109.5 . . ? 
C28 C30 H30A 109.5 . . ? 
C28 C30 H30B 109.5 . . ? 
H30A C30 H30B 109.5 . . ? 
C28 C30 H30C 109.5 . . ? 
H30A C30 H30C 109.5 . . ? 
H30B C30 H30C 109.5 . . ? 
C33 C31 C32 116.5(5) . . ? 
C33 C31 C25 110.7(4) . . ? 
C32 C31 C25 108.4(4) . . ? 
C33 C31 H31 106.9 . . ? 
C32 C31 H31 106.9 . . ? 
C25 C31 H31 106.9 . . ? 
C33A C31A C32A 121.3(5) . . ? 
C33A C31A C25 114.8(4) . . ? 
C32A C31A C25 106.3(4) . . ? 
C33A C31A H31A 104.2 . . ? 
C32A C31A H31A 104.2 . . ? 
C25 C31A H31A 104.2 . . ? 
C31A C32A H32D 109.5 . . ? 
C31A C32A H32E 109.5 . . ? 
H32D C32A H32E 109.5 . . ? 
C31A C32A H32F 109.5 . . ? 
H32D C32A H32F 109.5 . . ? 
H32E C32A H32F 109.5 . . ? 
C31A C33A H33D 109.5 . . ? 
C31A C33A H33E 109.5 . . ? 
H33D C33A H33E 109.5 . . ? 
C31A C33A H33F 109.5 . . ? 
H33D C33A H33F 109.5 . . ? 
H33E C33A H33F 109.5 . . ? 
C27 C34 C35 113.3(3) . . ? 
C27 C34 C36 110.0(3) . . ? 
C35 C34 C36 110.7(3) . . ? 
C27 C34 H34 107.5 . . ? 
C35 C34 H34 107.5 . . ? 
C36 C34 H34 107.5 . . ? 
C34 C35 H35A 109.5 . . ? 
C34 C35 H35B 109.5 . . ? 
H35A C35 H35B 109.5 . . ? 
C34 C35 H35C 109.5 . . ? 
H35A C35 H35C 109.5 . . ? 
H35B C35 H35C 109.5 . . ? 
C34 C36 H36A 109.5 . . ? 
C34 C36 H36B 109.5 . . ? 
H36A C36 H36B 109.5 . . ? 
C34 C36 H36C 109.5 . . ? 
H36A C36 H36C 109.5 . . ? 
H36B C36 H36C 109.5 . . ? 
Si1 C37 H37A 109.5 . . ? 
Si1 C37 H37B 109.5 . . ? 
H37A C37 H37B 109.5 . . ? 
Si1 C37 H37C 109.5 . . ? 
H37A C37 H37C 109.5 . . ? 
H37B C37 H37C 109.5 . . ? 
Si1 C38 H38A 109.5 . . ? 
Si1 C38 H38B 109.5 . . ? 
H38A C38 H38B 109.5 . . ? 
Si1 C38 H38C 109.5 . . ? 
H38A C38 H38C 109.5 . . ? 
H38B C38 H38C 109.5 . . ? 
Si1 C39 H39A 109.5 . . ? 
Si1 C39 H39B 109.5 . . ? 
H39A C39 H39B 109.5 . . ? 
Si1 C39 H39C 109.5 . . ? 
H39A C39 H39C 109.5 . . ? 
H39B C39 H39C 109.5 . . ? 
C42 C41 H41A 109.5 . . ? 
C42 C41 H41B 109.5 . . ? 
H41A C41 H41B 109.5 . . ? 
C42 C41 H41C 109.5 . . ? 
H41A C41 H41C 109.5 . . ? 
H41B C41 H41C 109.5 . . ? 
C41 C42 C43 105.1(7) . . ? 
C41 C42 H42A 110.7 . . ? 
C43 C42 H42A 110.7 . . ? 
C41 C42 H42B 110.7 . . ? 
C43 C42 H42B 110.7 . . ? 
H42A C42 H42B 108.8 . . ? 
C42 C43 C44 106.7(8) . . ? 
C42 C43 H43A 110.4 . . ? 
C44 C43 H43A 110.4 . . ? 
C42 C43 H43B 110.4 . . ? 
C44 C43 H43B 110.4 . . ? 
H43A C43 H43B 108.6 . . ? 
C45 C44 C43 106.4(8) . . ? 
C45 C44 H44A 110.5 . . ? 
C43 C44 H44A 110.5 . . ? 
C45 C44 H44B 110.5 . . ? 
C43 C44 H44B 110.5 . . ? 
H44A C44 H44B 108.6 . . ? 
C46 C45 C44 109.3(9) . . ? 
C46 C45 H45A 109.8 . . ? 
C44 C45 H45A 109.8 . . ? 
C46 C45 H45B 109.8 . . ? 
C44 C45 H45B 109.8 . . ? 
H45A C45 H45B 108.3 . . ? 
C45 C46 H46A 109.5 . . ? 
C45 C46 H46B 109.5 . . ? 
H46A C46 H46B 109.5 . . ? 
C45 C46 H46C 109.5 . . ? 
H46A C46 H46C 109.5 . . ? 
H46B C46 H46C 109.5 . . ? 
C42A C41A H41D 109.5 . . ? 
C42A C41A H41E 109.5 . . ? 
H41D C41A H41E 109.5 . . ? 
C42A C41A H41F 109.5 . . ? 
H41D C41A H41F 109.5 . . ? 
H41E C41A H41F 109.5 . . ? 
C41A C42A C43A 105.4(9) . . ? 
C41A C42A H42C 110.7 . . ? 
C43A C42A H42C 110.7 . . ? 
C41A C42A H42D 110.7 . . ? 
C43A C42A H42D 110.7 . . ? 
H42C C42A H42D 108.8 . . ? 
C44A C43A C42A 106.8(9) . . ? 
C44A C43A H43C 110.4 . . ? 
C42A C43A H43C 110.4 . . ? 
C44A C43A H43D 110.4 . . ? 
C42A C43A H43D 110.4 . . ? 
H43C C43A H43D 108.6 . . ? 
C43A C44A C45A 107.2(8) . . ? 
C43A C44A H44C 110.3 . . ? 
C45A C44A H44C 110.3 . . ? 
C43A C44A H44D 110.3 . . ? 
C45A C44A H44D 110.3 . . ? 
H44C C44A H44D 108.5 . . ? 
C44A C45A C46A 106.7(9) . . ? 
C44A C45A H45C 110.4 . . ? 
C46A C45A H45C 110.4 . . ? 
C44A C45A H45D 110.4 . . ? 
C46A C45A H45D 110.4 . . ? 
H45C C45A H45D 108.6 . . ? 
C45A C46A H46D 109.5 . . ? 
C45A C46A H46E 109.5 . . ? 
H46D C46A H46E 109.5 . . ? 
C45A C46A H46F 109.5 . . ? 
H46D C46A H46F 109.5 . . ? 
H46E C46A H46F 109.5 . . ? 
C52 C51 H51A 109.5 . . ? 
C52 C51 H51B 109.5 . . ? 
H51A C51 H51B 109.5 . . ? 
C52 C51 H51C 109.5 . . ? 
H51A C51 H51C 109.5 . . ? 
H51B C51 H51C 109.5 . . ? 
C53 C52 C51 107.5(8) . . ? 
C53 C52 H52A 110.2 . . ? 
C51 C52 H52A 110.2 . . ? 
C53 C52 H52B 110.2 . . ? 
C51 C52 H52B 110.2 . . ? 
H52A C52 H52B 108.5 . . ? 
C54 C53 C52 110.2(8) . . ? 
C54 C53 H53A 109.6 . . ? 
C52 C53 H53A 109.6 . . ? 
C54 C53 H53B 109.6 . . ? 
C52 C53 H53B 109.6 . . ? 
H53A C53 H53B 108.1 . . ? 
C53 C54 C55 111.1(8) . . ? 
C53 C54 H54A 109.4 . . ? 
C55 C54 H54A 109.4 . . ? 
C53 C54 H54B 109.4 . . ? 
C55 C54 H54B 109.4 . . ? 
H54A C54 H54B 108.0 . . ? 
C56 C55 C54 110.1(9) . . ? 
C56 C55 H55A 109.7 . . ? 
C54 C55 H55A 109.7 . . ? 
C56 C55 H55B 109.7 . . ? 
C54 C55 H55B 109.7 . . ? 
H55A C55 H55B 108.2 . . ? 
C55 C56 H56A 109.5 . . ? 
C55 C56 H56B 109.5 . . ? 
H56A C56 H56B 109.5 . . ? 
C55 C56 H56C 109.5 . . ? 
H56A C56 H56C 109.5 . . ? 
H56B C56 H56C 109.5 . . ? 
 
_diffrn_measured_fraction_theta_max    0.999 
_diffrn_reflns_theta_full              27.50 
_diffrn_measured_fraction_theta_full   0.999 
_refine_diff_density_max    0.607 
_refine_diff_density_min   -0.397 
_refine_diff_density_rms    0.058 
